# Supplementary material
Source: PubMed Central journal article supplement (PMC8532503)
Supplement: NIHMS1745197-supplement-1.pdf [file NIHMS1745197-supplement-1.pdf]

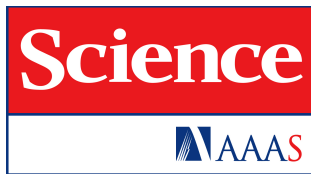

## Supplementary Materials for

Serum amyloid A delivers retinol to intestinal myeloid cells  
to promote adaptive immunity

Ye-Ji Bang, Zehan Hu, Yun Li, Sureka Gattu, Kelly A. Ruhn, Prithvi Raj, Joachim Herz,  
and Lora V. Hooper

correspondence to: [lora.hooper@utsouthwestern.edu](mailto:lora.hooper@utsouthwestern.edu)

**This PDF file includes:**

Figs. S1 to S17  
Tables S1 to S3

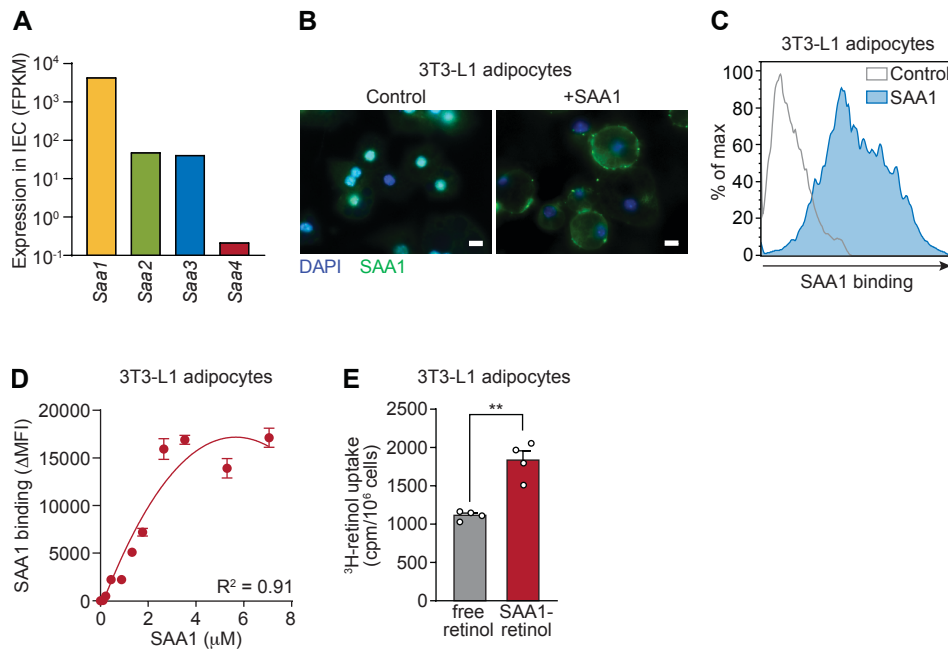

**Fig. S1. 3T3-L1 adipocytes express cell-surface receptor(s) for SAA.** (A) Expression of *Saa* transcripts in intestinal epithelial cells (IEC) was analyzed based on previously published RNA-sequencing data (52) (Gene Expression Omnibus accession number GSE134303). Data are from three pooled biological replicates of small intestinal epithelial cells acquired by laser capture microdissection (52). (B, C) Binding of SAA1 to the cell surface of 3T3-L1 adipocytes was analyzed by immunofluorescence assay (B) and flow cytometry (C). His-SAA1–retinol complexes were added to 3T3-L1 adipocytes and incubated for 1 hour at 4°C. (B) Cells were stained with Alexa Fluor 488-conjugated anti-His tag antibody to detect SAA (green) and nuclei were stained with DAPI (blue). Scale bars=10  $\mu$ m. (C) SAA binding to the adipocyte cell surface was measured by flow cytometry. PE-conjugated anti-His tag antibody was added to the adipocytes under non-permeablizing conditions. PBS was used as a control. (D) Binding of SAA1 to the adipocyte cell surface is saturable. Increasing concentrations of His-SAA1 were added to adipocytes for 30 min at 4°C. SAA bound to the cell surface was then detected by flow cytometry under non-permeablizing conditions using a PE-conjugated anti-His tag antibody. Means $\pm$ SEM from at least  $n=3$  are plotted.  $**P<0.01$  by Student’s *t* test. (E)  $^3$ H-retinol (358 nM) was added to adipocytes with or without pre-incubation with SAA1 (1.07  $\mu$ M). After incubating for 3 hours at 37°C, the  $^3$ H-retinol in the cell pellet was measured and normalized by cell number as a readout of retinol uptake.

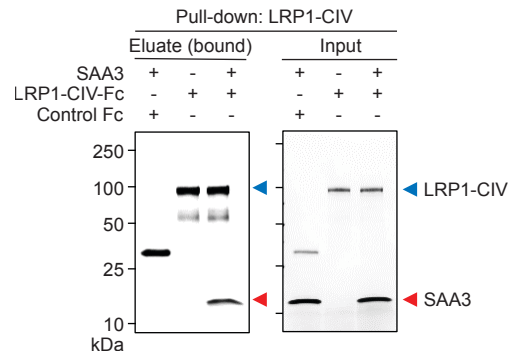

**Fig. S2. Mouse SAA3 binds to LRP1-CIV.** Binding of mouse SAA3 to LRP1 ligand binding cluster CIV (LRP1-CIV) was tested by pull-down assay. Fc-tagged LRP1-CIV and Fc protein (negative control) were incubated with purified recombinant SAA3. Input proteins are shown (right). Protein G magnetic beads were used to capture Fc-tagged LRP1-CIV or control Fc proteins in the eluate (left).

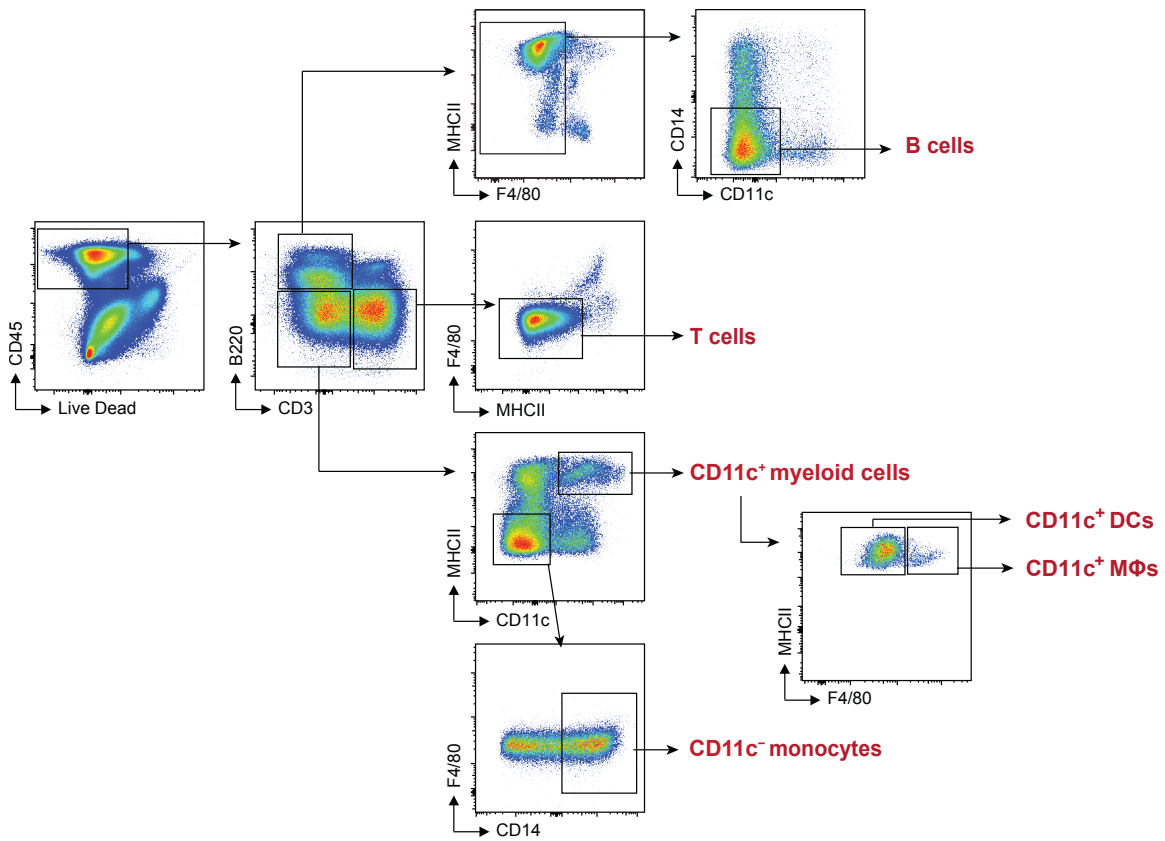

**Fig. S3. Flow cytometry gating strategy for assessing LRP1 expression.** Small intestinal lamina propria cells were isolated and analyzed by flow cytometry. B cells (live CD45<sup>+</sup>B220<sup>+</sup>CD3<sup>-</sup>CD14<sup>-</sup>F4/80<sup>-</sup>CD11c<sup>-</sup>), T cells (live CD45<sup>+</sup>CD3<sup>+</sup>B220<sup>-</sup>F4/80<sup>-</sup>MHCII<sup>-</sup>), CD11c<sup>-</sup> monocytes (live CD45<sup>+</sup>CD14<sup>+</sup>CD3<sup>-</sup>B220<sup>-</sup>MHCII<sup>-</sup>CD11c<sup>-</sup>), and CD11c<sup>+</sup> myeloid cells (live CD45<sup>+</sup>CD11c<sup>+</sup>MHCII<sup>+</sup>CD3<sup>-</sup>B220<sup>-</sup>) were gated as shown. CD11c<sup>+</sup> myeloid cells were further gated into DCs (live CD45<sup>+</sup>CD11c<sup>+</sup>MHCII<sup>+</sup>F4/80<sup>-</sup>CD3<sup>-</sup>B220<sup>-</sup>) and macrophages (live CD45<sup>+</sup>CD11c<sup>+</sup>MHCII<sup>+</sup>F4/80<sup>+</sup>CD3<sup>-</sup>B220<sup>-</sup>). Representative plots are presented and LRP1 expression on each cell population is shown in Fig. 3F and G.

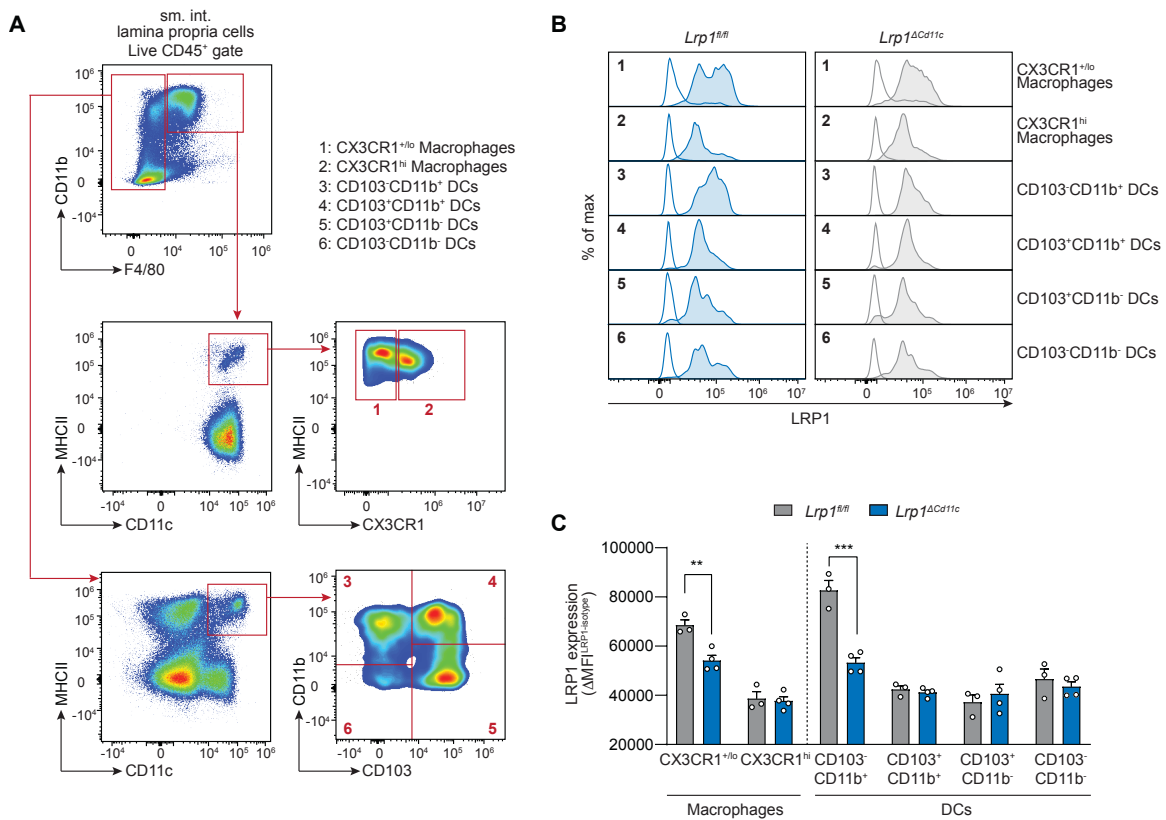

**Fig. S4. Expression of LRP1 by CD11c<sup>+</sup> myeloid cell subpopulations in mouse small intestine.** Small intestinal lamina propria cells were isolated and analyzed by flow cytometry. **(A)** Gating strategy for assessing LRP1 expression. Macrophages (live CD45<sup>+</sup>F4/80<sup>+</sup>CD11b<sup>+</sup>CD11c<sup>+</sup>MHCII<sup>+</sup>) were further gated by their expression of CX3CR1. DCs (live CD45<sup>+</sup>F4/80<sup>-</sup>CD11c<sup>+</sup>MHCII<sup>+</sup>) were further gated by their expression of CD103 and CD11b. Representative plots are presented. **(B)** Representative histograms showing LRP1 expression on each cell population are shown. Empty histograms are from isotype controls. **(C)** LRP1 expression (ΔMFI) is shown as the difference in MFI between isotype-matched control and anti-LRP1 antibody staining (MFI<sup>LRP1</sup> - MFI<sup>isotype</sup>). Means ± SEM are plotted. \*\**P* < 0.01; \*\*\**P* < 0.001; by Student's *t* test.

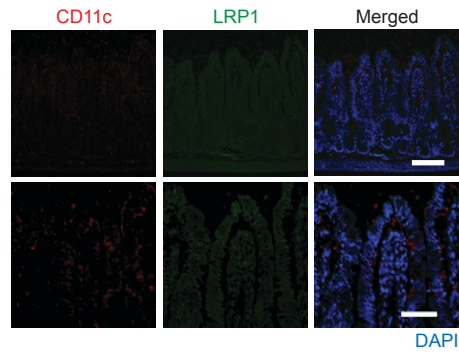

**Fig. S5. Immunofluorescence controls for Fig. 3G.** Immunofluorescence analysis of mouse ileum with isotype control antibodies (rabbit IgG and Armenian hamster IgG). Cy3-conjugated donkey anti-rabbit IgG and AlexaFluor647-conjugated goat anti-Armenian hamster IgG were used for secondary antibodies. Nuclei are stained with DAPI. Scale bar is 100  $\mu\text{m}$  for the upper panel and 50  $\mu\text{m}$  for the lower panel.

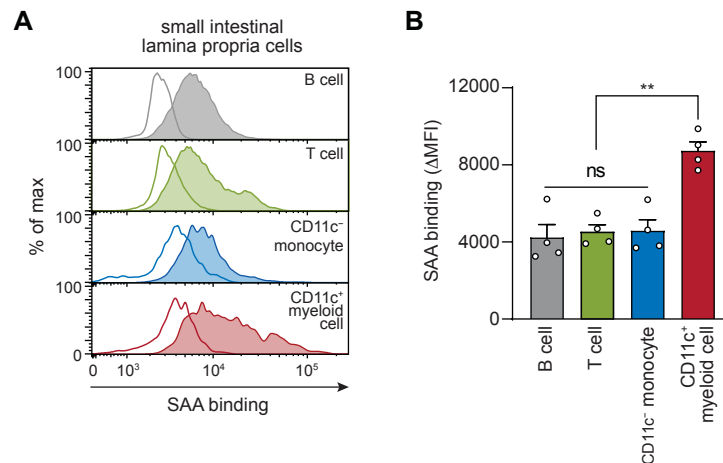

**Fig. S6. Binding of SAA–retinol complexes to small intestinal immune cells.** Small intestinal lamina propria cells were isolated and incubated with His-SAA1–retinol complexes at 4°C. Binding of His-SAA1–retinol complexes to cells was then analyzed by flow cytometry. B cells (CD45<sup>+</sup>B220<sup>+</sup>CD3<sup>-</sup>CD14<sup>-</sup>CD11c<sup>-</sup>), T cells (CD45<sup>+</sup>CD3<sup>+</sup>B220<sup>-</sup>CD14<sup>-</sup>MHCII<sup>-</sup>), CD11c<sup>-</sup> monocytes (CD45<sup>+</sup>CD14<sup>+</sup>CD3<sup>-</sup>B220<sup>-</sup>MHCII<sup>-</sup>CD11c<sup>-</sup>), and CD11c<sup>+</sup> myeloid cells (CD45<sup>+</sup>CD11c<sup>+</sup>MHCII<sup>+</sup>CD3<sup>-</sup>B220<sup>-</sup>) were gated. **(A)** Representative histograms are shown. Empty histograms are controls in which PBS was added instead of SAA1, and filled histograms are samples with SAA1 added. All samples including controls were stained with a PE-conjugated anti-His antibody. **(B)** SAA1 binding was calculated as ΔMFI (median fluorescence intensity) of SAA1 (MFI<sup>SAA1</sup>–MFI<sup>PBS</sup>). Means±SEM from *n*=4 mice are plotted. \*\**P*<0.01 by Student’s *t* test.

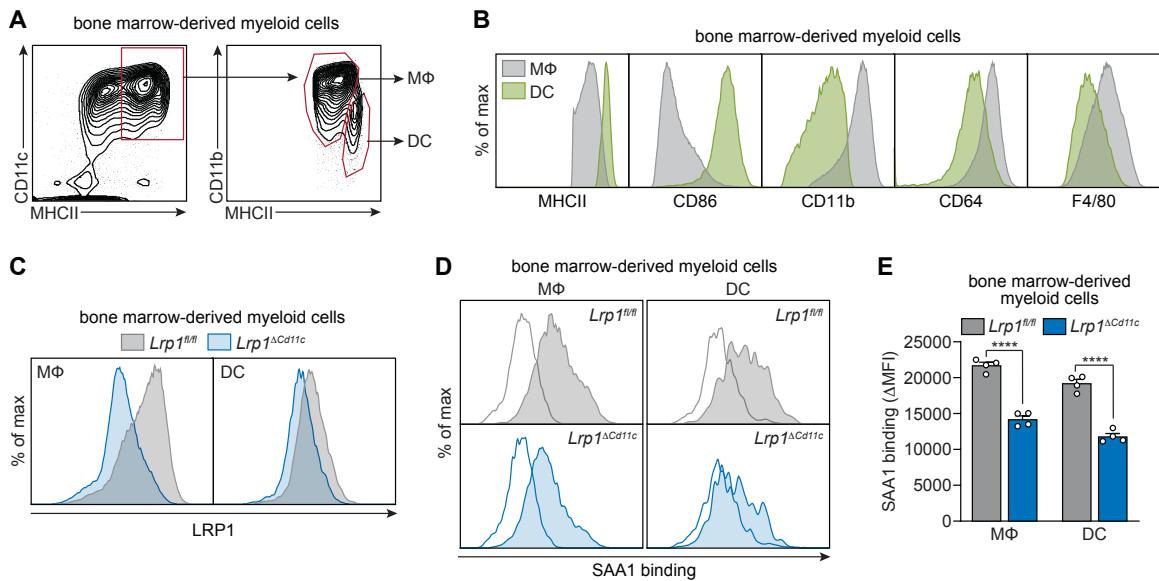

**Fig. S7. Analysis of dendritic cells and macrophages for LRP1 expression and SAA1 binding.** Bone marrow-derived cells from *Lrp1<sup>fl/fl</sup>* and *Lrp1<sup>ΔCd11c</sup>* mice were cultured with GM-CSF (granulocyte-macrophage colony-stimulating factor) and CD11c<sup>+</sup> bone marrow-derived myeloid cells were isolated by CD11c magnetic bead sorting and analyzed by flow cytometry. **(A)** Gating strategy for identification of macrophages (MΦ) (CD11c<sup>+</sup>MHCII<sup>+</sup>CD11b<sup>hi</sup>) and dendritic cells (DC) (CD11c<sup>+</sup>MHCII<sup>hi</sup>CD11b<sup>+/int</sup>) are shown. **(B)** Expression of MHCII, CD86, CD11b, CD64, F4/80 on macrophages and dendritic cells were analyzed. Macrophages are MHCII<sup>+</sup>CD86<sup>-</sup>CD11b<sup>hi</sup>CD64<sup>+</sup>F4/80<sup>+</sup>, and dendritic cells are MHCII<sup>hi</sup>CD86<sup>+</sup>CD11b<sup>+/int</sup>CD64<sup>-</sup>F4/80<sup>-</sup>. **(C)** Expression of LRP1 on macrophages and DC from *Lrp1<sup>fl/fl</sup>* and *Lrp1<sup>ΔCd11c</sup>* mice. **(D and E)** SAA1 binding to macrophages and DC from *Lrp1<sup>fl/fl</sup>* and *Lrp1<sup>ΔCd11c</sup>* mice. His-SAA1–retinol complexes were added to bone marrow-derived myeloid cells at 4°C to allow binding of SAA1 to the cell surface. Cells were then washed, fixed, and stained with antibodies. **(D)** Representative histograms are shown. Empty histograms are controls in which PBS was added instead of SAA1, and filled histograms are samples with SAA1 added. All samples including controls were stained with a PE-conjugated anti-His antibody. **(E)** SAA1 binding was calculated as ΔMFI (median fluorescence intensity) of SAA1 (MFI<sup>SAA1</sup>–MFI<sup>PBS</sup>). Means±SEM from *n*=4 are plotted. \*\*\*\**P*<0.0001 by Student's *t* test. MΦ, macrophage; DC, dendritic cells.



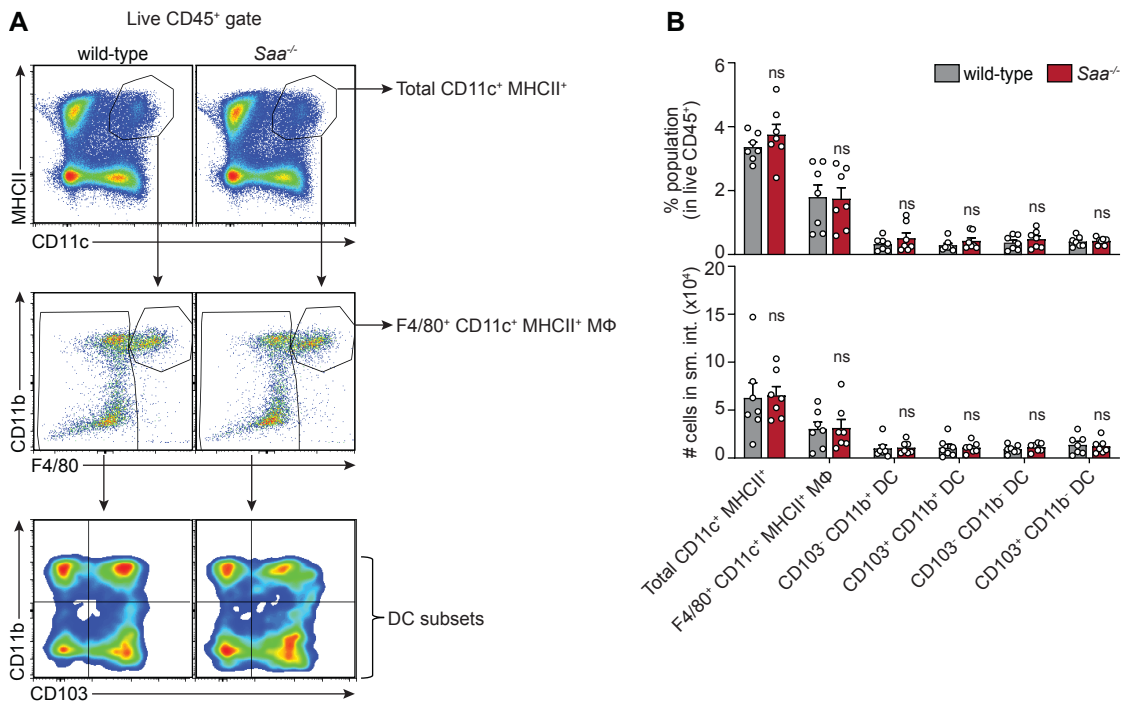

**Fig. S8. Characterization of small intestinal CD11c<sup>+</sup>MHCII<sup>+</sup> cells from wild-type and *Saa*<sup>-/-</sup> mice.** Small intestinal lamina propria cells from wild-type and *Saa*<sup>-/-</sup> mice were analyzed for their CD11c<sup>+</sup>MHCII<sup>+</sup> cell numbers and compositions. **(A)** Representative flow cytometry plots showing gating strategies. **(B)** Percentages among total live CD45<sup>+</sup> cells (top) and absolute cell numbers (bottom) of each cell population are shown. Means±SEM are plotted. ns, not significant by Student's *t* test. sm. int., small intestine.

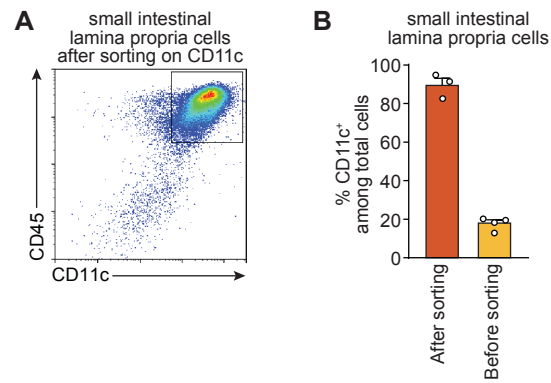

**Fig. S9. Magnetic sorting of small intestinal lamina propria CD11c<sup>+</sup> cells.** Mouse small intestinal lamina propria CD11c<sup>+</sup> cells were isolated using anti-CD11c beads. **(A)** A representative flow cytometry plot of cells after bead isolation is shown. **(B)** Percentage of CD11c<sup>+</sup> cells among total cells before and after sorting. Means±SEM are plotted.

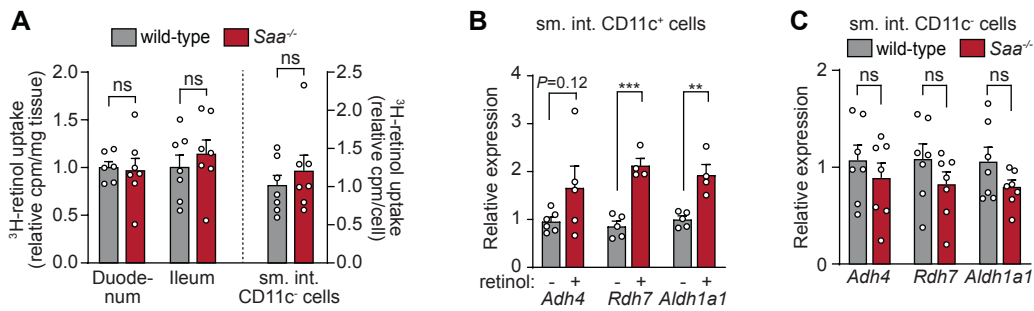

**Fig. S10. Retinol uptake in tissues and cells from wild-type and *Saa*<sup>-/-</sup> mice.** (A) <sup>3</sup>H-retinol was fed to wild-type and *Saa*<sup>-/-</sup> mice. Following sacrifice, the duodenum (proximal small intestine) and ileum (distal small intestine) were flushed to remove the fecal contents, and lamina propria cells were recovered and separated into CD11c<sup>+</sup> and CD11c<sup>-</sup> cell populations using CD11c magnetic beads. The CD11c<sup>+</sup> cells were used in experiments depicted in Fig. 5, A and B, and the negatively selected CD11c<sup>-</sup> cells were analyzed in the experiments depicted in this figure. <sup>3</sup>H-retinol cpm were normalized to tissue weight (for duodenum and ileum) or to cell number (for CD11c<sup>-</sup> cells). (B) Immune cells were recovered from the small intestinal lamina propria of *Saa*<sup>-/-</sup> mice and the CD11c<sup>+</sup> cells were isolated by magnetic bead sorting. CD11c<sup>+</sup> cells were incubated with or without 100 μM retinol for 2 hours in a 5% CO<sub>2</sub> incubator at 37°C. Transcript abundances were normalized to *Gapdh* transcript abundance and expressed relative to no retinol controls. (C) Small intestinal lamina propria CD11c<sup>-</sup> cells were used for qPCR analysis of transcripts encoding proteins involved in retinol conversion to retinoic acid. Transcript abundances were normalized to *Gapdh* transcript abundance and expressed relative to wild-type transcript abundances. sm. int., small intestine. Means±SEM from at least *n*=3 mice are plotted. \*\**P*<0.01; \*\*\**P*<0.001; ns, not significant by Student's *t* test.



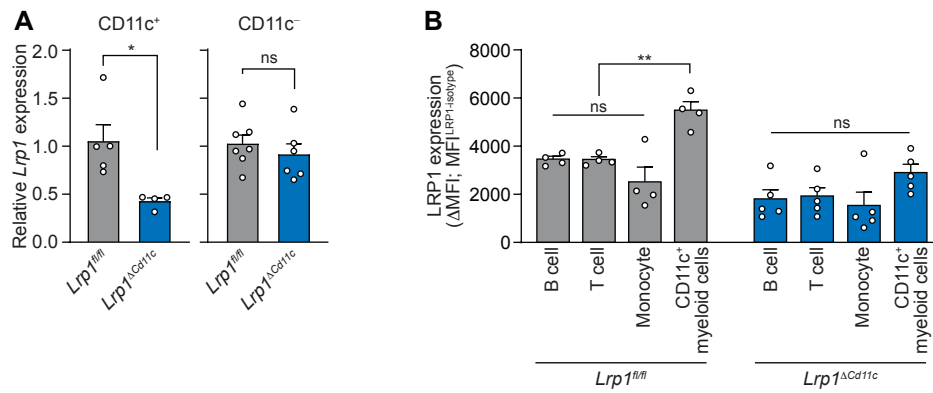

**Fig. S12. LRP1 expression in intestinal CD11c<sup>+</sup> cells from *Lrp1<sup>fl/fl</sup>* and *Lrp1<sup>ΔCd11c</sup>* mice.** (A) qPCR analysis of *Lrp1* expression in small intestinal lamina propria CD11c<sup>+</sup> and CD11c<sup>-</sup> cells from *Lrp1<sup>fl/fl</sup>* and *Lrp1<sup>ΔCd11c</sup>* mice. (B) Flow cytometry analysis of LRP1 expression on B cells, T cells, monocytes, and CD11c<sup>+</sup> myeloid cells from the small intestinal lamina propria of *Lrp1<sup>fl/fl</sup>* and *Lrp1<sup>ΔCd11c</sup>* mice. LRP1 expression was determined by subtracting isotype-matched control MFI from LRP1 MFI of each cell population (MFI<sup>LRP1</sup> - MFI<sup>isotype</sup>). Means ± SEM are plotted. \**P* < 0.05; \*\**P* < 0.01; ns, not significant as determined by Student's *t* test. MFI, median fluorescence intensity.

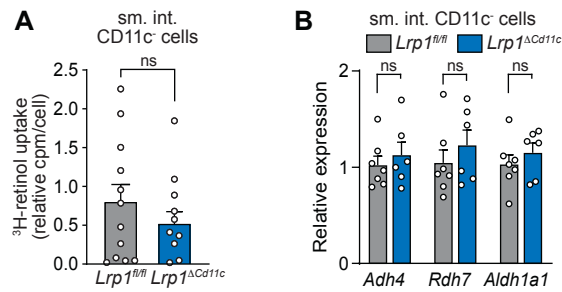

**Fig. S13. Retinol quantification in tissues and cells from *Lrp1<sup>fl/fl</sup>* and *Lrp1<sup>ΔCd11c</sup>* mice.** (A) <sup>3</sup>H-retinol was fed to *Lrp1<sup>fl/fl</sup>* and *Lrp1<sup>ΔCd11c</sup>* mice. Small intestinal lamina propria cells were recovered and processed with magnetic bead isolation using anti-CD11c beads. CD11c<sup>+</sup> cells were analyzed in Fig. 5, E and F, and CD11c<sup>-</sup> cells were analyzed here. <sup>3</sup>H-retinol cpm were normalized to cell number. (B) Small intestinal lamina propria CD11c<sup>-</sup> cells from CD11c magnetic sorting were used for qPCR analysis of transcripts encoding proteins involved in retinol conversion to retinoic acid. Transcript abundances were normalized to *Gapdh* transcript abundance and expressed relative to *Lrp1<sup>fl/fl</sup>* transcript abundances. Means±SEM are plotted. ns, not significant by Student's *t* test.

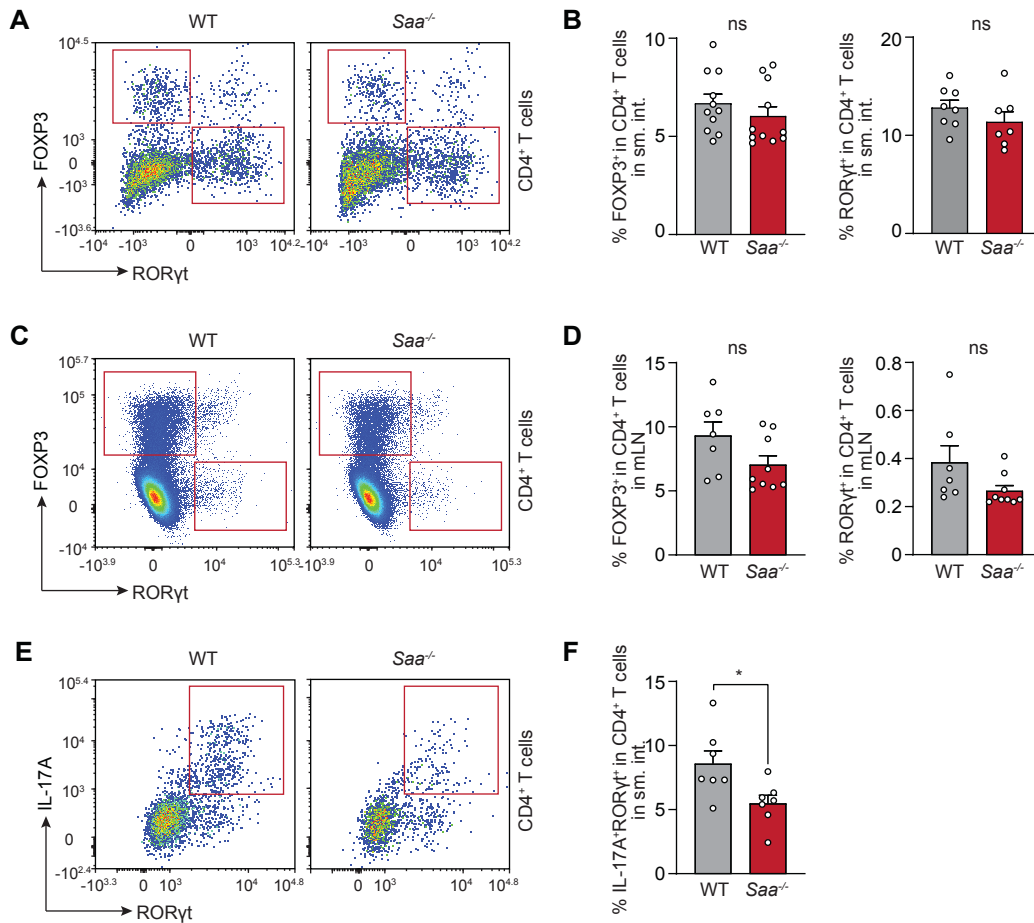

**Fig. S14. T<sub>reg</sub> and T<sub>H</sub>17 cell frequencies in the small intestines and mesenteric lymph nodes of wild-type and *Saa*<sup>-/-</sup> mice.** (A and C) Representative flow plots of T cells (CD45<sup>+</sup>CD3<sup>+</sup>CD4<sup>+</sup>) expressing FOXP3 and RORγt, which mark T<sub>reg</sub> and T<sub>H</sub>17 cells, respectively. Cells were isolated from the small intestinal lamina propria (A) and mesenteric lymph nodes (C) of wild-type and *Saa*<sup>-/-</sup> mice and stained with antibodies against the indicated T cell markers. (B) Quantification of T<sub>reg</sub> and T<sub>H</sub>17 cell frequencies in A. (D) Quantification of T<sub>reg</sub> and T<sub>H</sub>17 frequencies in C. (E and F) IL-17<sup>+</sup>RORγt<sup>+</sup> T<sub>H</sub>17 cells from small intestinal lamina propria cells of wild-type and *Saa*<sup>-/-</sup> mice. Representative flow plots of T cells (CD45<sup>+</sup>CD3<sup>+</sup>CD4<sup>+</sup>) expressing RORγt and IL-17A (E) and quantification (F) are shown. Means±SEM are plotted. \**P*<0.05; ns, not significant as determined by Student's *t* test. sm. int., small intestine. mLN, mesenteric lymph nodes.

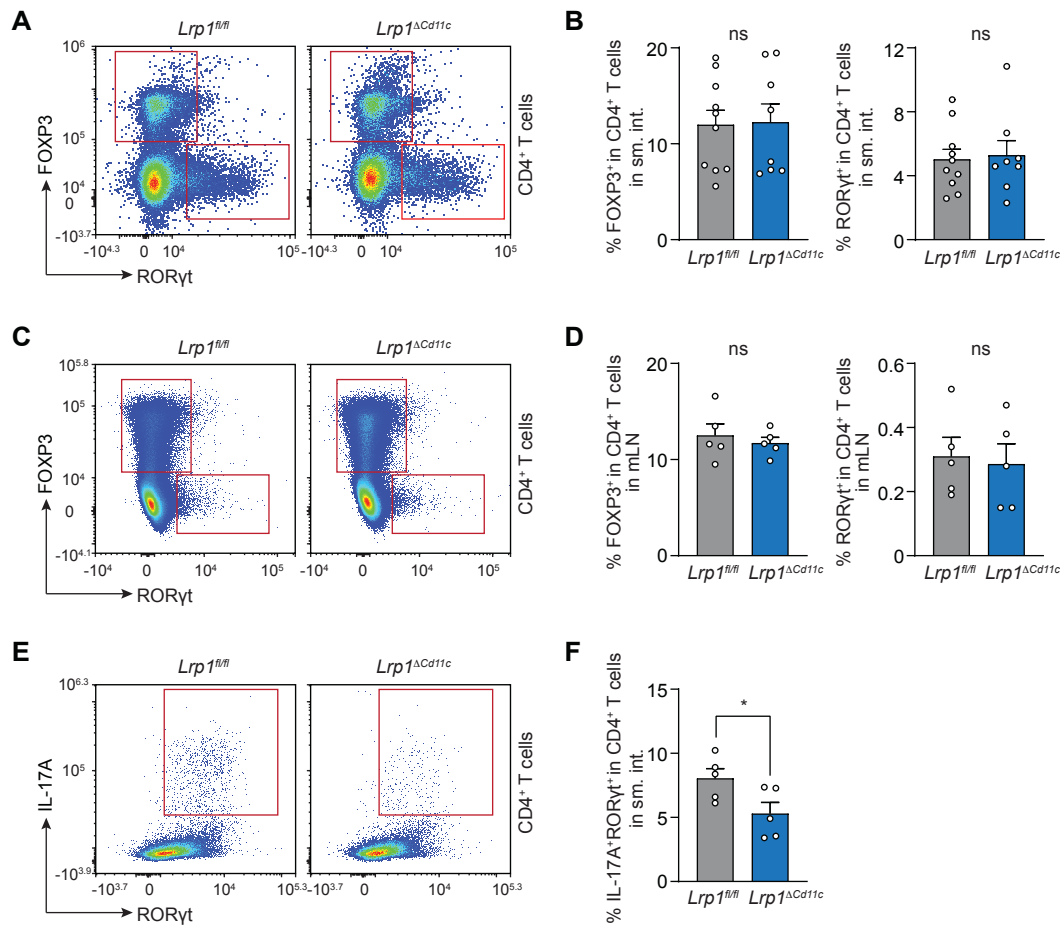

**Fig. S15. T<sub>reg</sub> and T<sub>H</sub>17 cell frequencies in the small intestines and mesenteric lymph nodes of *Lrp1<sup>fl/fl</sup>* and *Lrp1<sup>ΔCd11c</sup>* mice.** (A and C) Representative flow plots of T cells (CD45<sup>+</sup>CD3<sup>+</sup>CD4<sup>+</sup>) expressing FOXP3 and RORγt, which marks T<sub>reg</sub> and T<sub>H</sub>17 cells, respectively. Cells were isolated from the lamina propria of small intestines (A) and mesenteric lymph nodes (C) of *Lrp1<sup>fl/fl</sup>* and *Lrp1<sup>ΔCd11c</sup>* mice and stained with antibodies against the indicated T cell markers. (B) Quantification of T<sub>reg</sub> and T<sub>H</sub>17 frequencies in A. (D) Quantification of T<sub>reg</sub> and T<sub>H</sub>17 frequencies in C. (E and F) IL-17<sup>+</sup>RORγt<sup>+</sup> T<sub>H</sub>17 cells from small intestinal lamina propria cells of *Lrp1<sup>fl/fl</sup>* and *Lrp1<sup>ΔCd11c</sup>* mice. Representative flow plots of T cells (CD45<sup>+</sup>CD3<sup>+</sup>CD4<sup>+</sup>) expressing RORγt and IL-17A (E) and quantification (F) are shown. Means±SEM are plotted. \**P*<0.05; ns, not significant as determined by Student's *t* test. sm. int., small intestine. mLN, mesenteric lymph nodes.



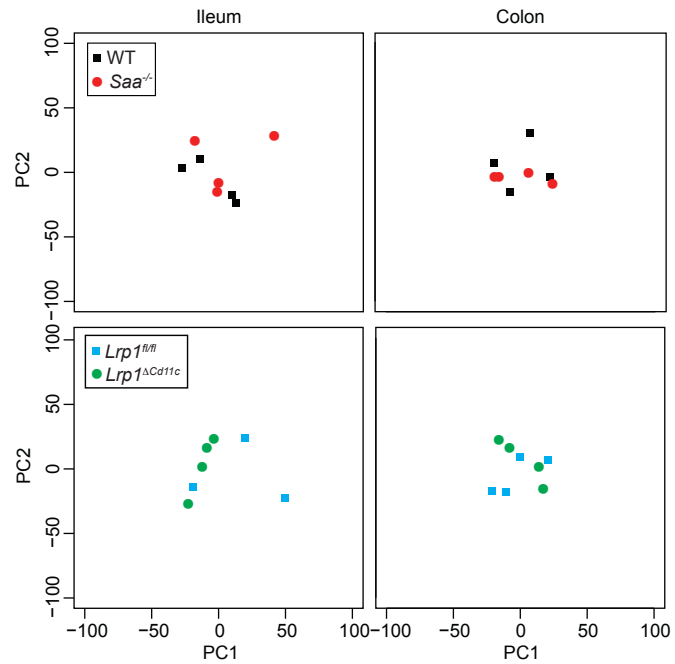

**Fig. S16. Intestinal microbiota analysis.** Principal coordinate analysis of 16S rRNA sequencing of mouse intestinal contents. Ileal and cecal contents from wild-type and *Saa*<sup>-/-</sup> mice, and *Lrp1*<sup>fl/fl</sup> and *Lrp1*<sup>ΔCd11c</sup> mice, were analyzed. The mice were littermates of heterozygous crosses that remained cohoused. Each dot represents one mouse.

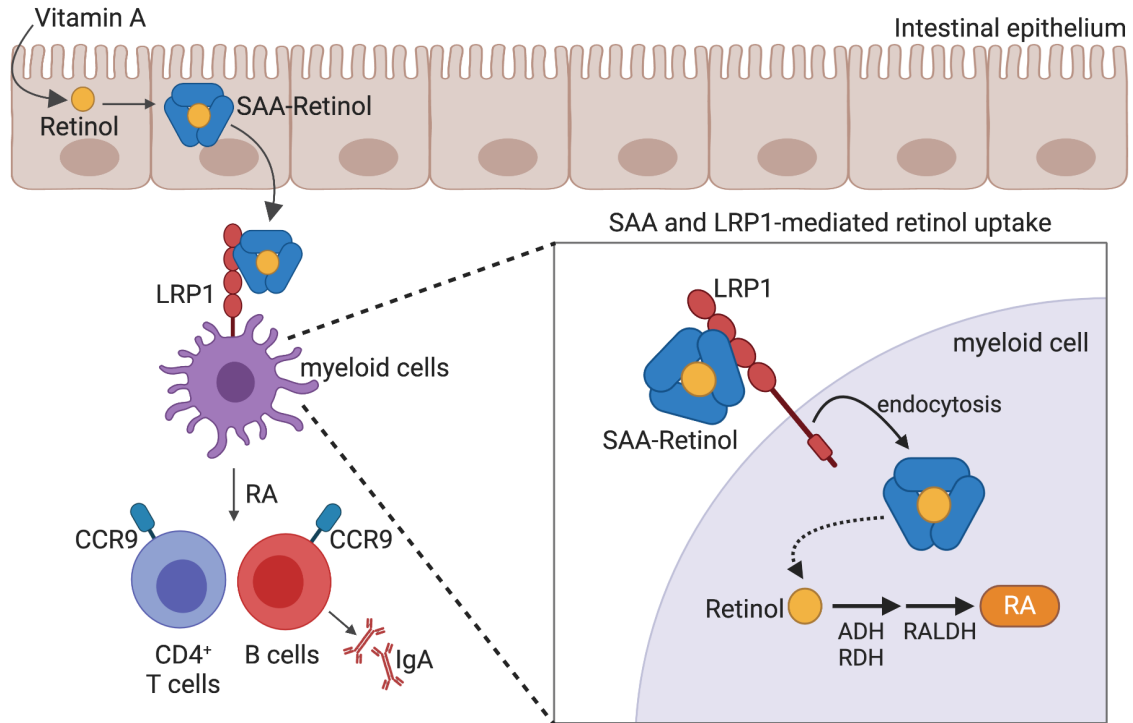

**Fig. S17. SAA delivers retinol to myeloid cells by binding to LRP1 and thus promotes adaptive immunity in the intestine.** SAA delivers retinol to intestinal CD11c<sup>+</sup> myeloid cells by binding to LRP1. LRP1 facilitates endocytosis of SAA–retinol complexes, and the retinol is converted to retinoic acid (RA) through a two-step enzymatic reaction. Myeloid cell RA promotes vitamin A-dependent intestinal adaptive immune responses. These include the induction of intestinal homing receptors, such as CCR9, on CD4<sup>+</sup> T cells and B cells, and IgA production by B cells. Illustration was created in BioRender (BioRender.com).

**Table S1. Mass spectrometry analysis of protein complexes from Fig. 1B**

| <b>Protein</b>                 | <b>Length<br/>(AA)</b> | <b>Mw<br/>(Da)</b> | <b>%<br/>Coverage</b> | <b>PSMs*</b> | <b>Peptide<br/>Seqs<sup>†</sup></b> | <b>MIC<br/>Sin<sup>§</sup></b> |
|--------------------------------|------------------------|--------------------|-----------------------|--------------|-------------------------------------|--------------------------------|
| His-tagged SAA1                | 124                    | 14075.5            | 99.20                 | 1080         | 21                                  | 3.06E-03                       |
| LDL receptor-related protein 1 | 4545                   | 505761.0           | 29.60                 | 543          | 111                                 | 2.38E-06                       |

\*PSMs (Peptide Spectrum Matches): Number of spectra assigned to peptides that contributed to the inference of the protein.

<sup>†</sup>Peptide Seqs: Number of different unique peptide sequences, or modified variants of sequences that were identified for the protein.

<sup>§</sup>MIC Sin: The normalized Spectral Index statistic for the protein (quantitative, approximate)

**Table S2. TaqMan probes used for qPCR**

| <b>Gene name</b> | <b>Description</b>                                        | <b>Assay ID</b> |
|------------------|-----------------------------------------------------------|-----------------|
| <i>Gapdh</i>     | Glyceraldehyde-3-phosphate dehydrogenase                  | Mm99999915_g1   |
| <i>Saa1</i>      | Serum amyloid A1                                          | Mm00656927_g1   |
| <i>Rbp4</i>      | Retinol binding protein 4                                 | Mm00803264_g1   |
| <i>Lrp1</i>      | LDL receptor-related protein 1                            | Mm00464608_m1   |
| <i>Lrp1</i>      | LDL receptor-related protein 1 (Exon1; used in fig. S12A) | Mm01160430_m1   |
| <i>Stra6</i>     | Stimulated by retinoic acid gene 6                        | Mm00486457_m1   |
| <i>Rbpr2</i>     | RBP receptor 2; STRA6-like                                | Mm01345313_m1   |
| <i>Adh4</i>      | Alcohol dehydrogenase 4                                   | Mm00478838_m1   |
| <i>Rdh7</i>      | Retinol dehydrogenase 7                                   | Mm00489956_g1   |
| <i>Aldh1a1</i>   | Aldehyde dehydrogenase family 1, subfamily A1             | Mm00657317_m1   |

**Table S3. Antibodies used for flow cytometry**

| Specificity | Clone        | Isotype              | Fluoro-chrome        | Supplier       | Catalog number | Final concentration         |
|-------------|--------------|----------------------|----------------------|----------------|----------------|-----------------------------|
| LRP1        | EPR3724      | Rabbit IgG           | AlexaFluor 488       | Abcam          | ab195567       | 0.01 µg/µl                  |
| CD19        | 1D3          | Rat IgG2a            | FITC                 | Invitrogen     | 11-0193-82     | 0.01 µg/µl                  |
| IL-17A      | TC11-18H10.1 | Rat IgG1κ            | FITC                 | Biolegend      | 506907         | 0.025 µg/µl                 |
| IgA         | 11-44-2      | Rat IgG1             | PE                   | Invitrogen     | 12-5994-81     | 0.01 µg/µl                  |
| CCR9        | CW-1.2       | Mouse IgG2a          | PE                   | Invitrogen     | 12-1991-80     | 0.005 µg/µl                 |
| 6xHistidine | AD1.1.10     | Mouse IgG1           | PE                   | R&D Systems    | IC050P         | 1:100 (v/v)                 |
| CD11b       | M1/70        | Rat IgG2b            | PE                   | Biolegend      | 101208         | 0.0025 µg/µl                |
| CD4         | RM4-5        | Rat IgG2a            | PE                   | Biolegend      | 100512         | 0.0025 µg/µl                |
| B220        | RA3-6B2      | Rat IgG2a            | PE-Cyanine5          | Invitrogen     | 15-0452-82     | 0.0025 µg/µl                |
| CD11c       | N418         | Armenian Hamster IgG | PE-Cyanine5          | Invitrogen     | 15-0114-82     | 0.005 µg/µl                 |
| Foxp3       | FJK-16s      | Rat IgG2a            | PE-Cyanine5          | Invitrogen     | 15-5773-80     | 0.01 µg/µl                  |
| CD4         | RM4-5        | Rat IgG2a            | PE-Cyanine7          | Biolegend      | 100528         | 0.002 µg/µl                 |
| CD103       | 2E7          | Armenian Hamster IgG | PE-Cyanine7          | Biolegend      | 121426         | 0.002 µg/µl                 |
| MHCII       | M5/114.15.2  | Rat IgG2b            | PE-Cyanine7          | Biolegend      | 107630         | 0.0006 µg/µl                |
| CD14        | Sa2-8        | Rat IgG2a            | PerCP-eFluor 710     | Invitrogen     | 46-0141-82     | 0.005 µg/µl                 |
| CD8a        | 53-6.7       | Rat IgG2a            | APC                  | Invitrogen     | 17-0081-82     | 0.004 µg/µl                 |
| MHCII       | M5/114.15.2  | Rat IgG2b            | APC                  | Invitrogen     | 17-5321-82     | 0.0003 µg/µl                |
| CD86        | GL-1         | Rat IgG2a            | APC                  | Biolegend      | 139323         | 0.0025 µg/µl                |
| CD3         | 17A2         | Rat IgG2b            | APC                  | R&D Systems    | FAB4841A-100   | 10 µl/10 <sup>6</sup> cells |
| RORγt       | AFKJS-9      | Rat IgG2a            | APC                  | Invitrogen     | 17-6988-82     | 0.01 µg/µl                  |
| CD45        | 30-F11       | Rat IgG2b            | Brilliant violet 421 | Biolegend      | 103134         | 0.002 µg/µl                 |
| CD11c       | N418         | Armenian Hamster IgG | Brilliant violet 421 | Biolegend      | 117343         | 0.0025 µg/µl                |
| F4/80       | BM8          | Rat IgG2a            | Brilliant violet 510 | Biolegend      | 123135         | 0.004 µg/µl                 |
| CD64        | X54-5/7.1    | Mouse IgG1           | Brilliant violet 605 | Biolegend      | 139323         | 0.0024 µg/µl                |
| CD45        | 30-F11       | Rat IgG2b            | Brilliant violet 650 | Biolegend      | 103151         | 0.002 µg/µl                 |
| CD8a        | 53-6.7       | Rat IgG2a            | Brilliant violet 650 | Biolegend      | 100742         | 0.0025 µg/µl                |
| CD3         | 17A2         | Rat IgG2b            | Brilliant violet 711 | Biolegend      | 100241         | 0.004 µg/µl                 |
| F4/80       | T45-2342     | Rat IgG2a            | Brilliant violet 711 | BD Biosciences | 565612         | 0.006 µg/µl                 |
| CX3CR1      | SA011F11     | Mouse IgG2a          | Brilliant violet 785 | Biolegend      | 149029         | 0.00125 µg/µl               |
